# Supplementary material
Source: Springer Nature journal article supplement (https://www.springermedizin.de/resource/supplementary/13054_2011_494_MOESM1_ESM.pdf/9708608)
Supplement: MOESM1 [file 9708608]

Randomized (n = 75)

Methadone group (n = 43)

Control group (n = 32)

Excluded (n = 6):  
1 informed consent withdrawal  
1 suspension of sedation  
1 hospital transfer  
1 randomized twice  
2 clinical worsening

Excluded (n = 1):  
1 informed consent withdrawal

Included in analysis (n = 37)

Included in analysis (n = 31)
